# Supplementary material for: Carbon and nitrogen isotopic composition of commercial dog food in Brazil
Source: PeerJ. 2019 Feb 20;7:e5828. doi: 10.7717/peerj.5828 (PMC6387582; doi:10.7717/peerj.5828)
Supplement: Supplemental Information 1 — C3 grains and maize isotopic and C:N data. [file peerj-07-5828-s001.xlsx]

## Sheet: C3 grains and maize
Sources	δ13C	δ15N	C/N
C3 grains	-29.4027	5.48433	32.9593
C3 grains	-28.8757	7.18633	34.4097
C3 grains	-28.2677	7.34133	30.4947
C3 grains	-28.7307	8.49933	28.7628
C3 grains	-29.0167	8.63083	28.9436
C3 grains	-26.2167	2.44733	18.7815
C3 grains	-25.9537	2.95433	20.5314
C3 grains	-26.5377	3.28033	18.6861
C3 grains	-26.4887	3.60033	21.8382
C3 grains	-25.2932	4.33933	21.4394
C3 grains	-28.58	5.21	33.91
C3 grains	-28.35	5.69	31.69
C3 grains	-28.34	7.62	26.74
C3 grains	-28.08	5.59	29.01
C3 grains	-27.71	8.91	28.27
C3 grains	-27.175	11.705	32.03
C3 grains	-25.91	2.43	15.56
C3 grains	-25.015	2.845	18.58
C3 grains	-27.6537	1.11933	11.7006
C3 grains	-27.0887	1.23033	12.1969
C3 grains	-27.9927	1.27833	11.5286
C3 grains	-27.4457	1.29233	11.0824
C3 grains	-27.4417	2.12733	11.7608
C3 grains	-27.2107	3.47233	12.5681
C3 grains	-27.2147	3.47333	11.3776
C3 grains	-26.2717	5.07333	10.9339
C3 grains	-26.65	2.53	12.73
C3 grains	-27.3671	4.64298	21.4265
Maize	-11.475	1.754	31.8766
Maize	-10.971	2.087	23.3848
Maize	-10.701	2.266	28.636
Maize	-11.251	2.199	28.5828
Maize	-10.789	3.577	28.5139
Maize	-11.325	0.496	16.7085
Maize	-11.857	0.411	21.7196
Maize	-11.622	2.971	19.6557
Maize	-11.295	1.849	19.602
Maize	-11.386	2.449	16.0473
Maize	-12.383	2.155	17.7824
